# Supplementary material for: Photochemistry and DNA-affinity of some pyrimidine-substituted styryl-azinium iodides
Source: Royal Society of Chemistry journal article supplement (doi:10.1039/c1pp05214d), 2011-10-12
Supplement: c1pp05214d.pdf [file c1pp05214d.pdf]

## Photochemistry and DNA-affinity of some pyrimidine-substituted styryl-azinium iodides

A. Mazzoli,<sup>a</sup> B. Carlotti,<sup>a</sup> C. Bonaccorso,<sup>b</sup> C. G. Fortuna,<sup>b</sup> U. Mazzucato,<sup>a</sup> G. Miolo,<sup>c</sup> A. Spalletti<sup>a\*</sup>

<sup>a</sup> *Dipartimento di Chimica and Centro di Eccellenza Materiali Innovativi Nanostrutturati (CEMIN), Università di Perugia, 06123 Perugia, Italy*

<sup>b</sup> *Dipartimento di Scienze Chimiche, Università di Catania, 95125 Catania, Italy*

<sup>c</sup> *Dipartimento di Scienze Farmaceutiche, Università di Padova, 35131 Padova*

**Electronic Supplementary Information:** computational results, linear dichroism spectra and fitting of the .

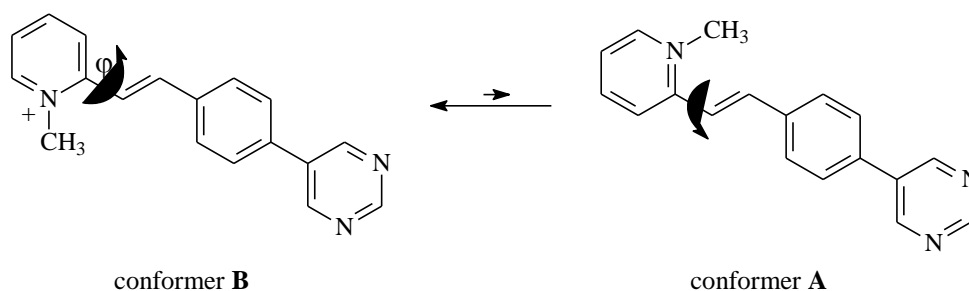

**Scheme ESI 1** Conformers of compound **1**

**Table ESI 1** Computed parameters for the ground state and the first electronic transitions of compounds **1-3**: formation enthalpy ( $\Delta H_f^\circ$ , kcal mol<sup>-1</sup>), relative conformational abundance at 293 K (%), dipole moment (D) in the ground ( $\mu_g$ ) and excited ( $\mu_e$ ) states, dihedral angle ( $\phi$ , degrees), absorption wavelength ( $\lambda$ , nm) and oscillator strength ( $f$ ).

| Compound    | $\Delta H_f^\circ$ | %    | $\phi$  | $\mu_g$ | $\mu_e$ | $\lambda$ | $f$  | configuration | coeff.      |
|-------------|--------------------|------|---------|---------|---------|-----------|------|---------------|-------------|
| <b>1(A)</b> | 257.948            | 1.4  | 54.39°  | 20.32   | 6.55    | 348       | 0.96 | H→L           | 0.64        |
|             |                    |      |         |         |         | 262       | 0.59 | H→L+1         | -0.62       |
| <b>1(B)</b> | 255.460            | 98.6 | 2.59°   | 19.23   | 8.80    | 363       | 1.63 | H→L           | 0.66        |
|             |                    |      |         |         |         | 259       | 0.23 | H→L+1         | 0.62        |
| <b>2(A)</b> | 270.821            | 0.6  | -42.18° | 16.48   | 1.81    | 365       | 1.46 | H→L           | 0.65        |
|             |                    |      |         |         |         | 245       | 0.59 | H→L+1, H-2→L  | 0.46, -0.33 |
| <b>2(B)</b> | 267.827            | 99.4 | -4.20°  | 15.50   | 3.65    | 371       | 1.93 | H→L           | 0.66        |
|             |                    |      |         |         |         | 257       | 0.19 | H→L+1, H-2→L  | 0.35, 0.48  |
| <b>3</b>    | 243.035            | 100  | -27.34° | 18.90   | 10.77   | 338       | 1.59 | H→L           | 0.67        |
|             |                    |      |         |         |         | 220       | 0.36 | H→L+1         | -0.61       |

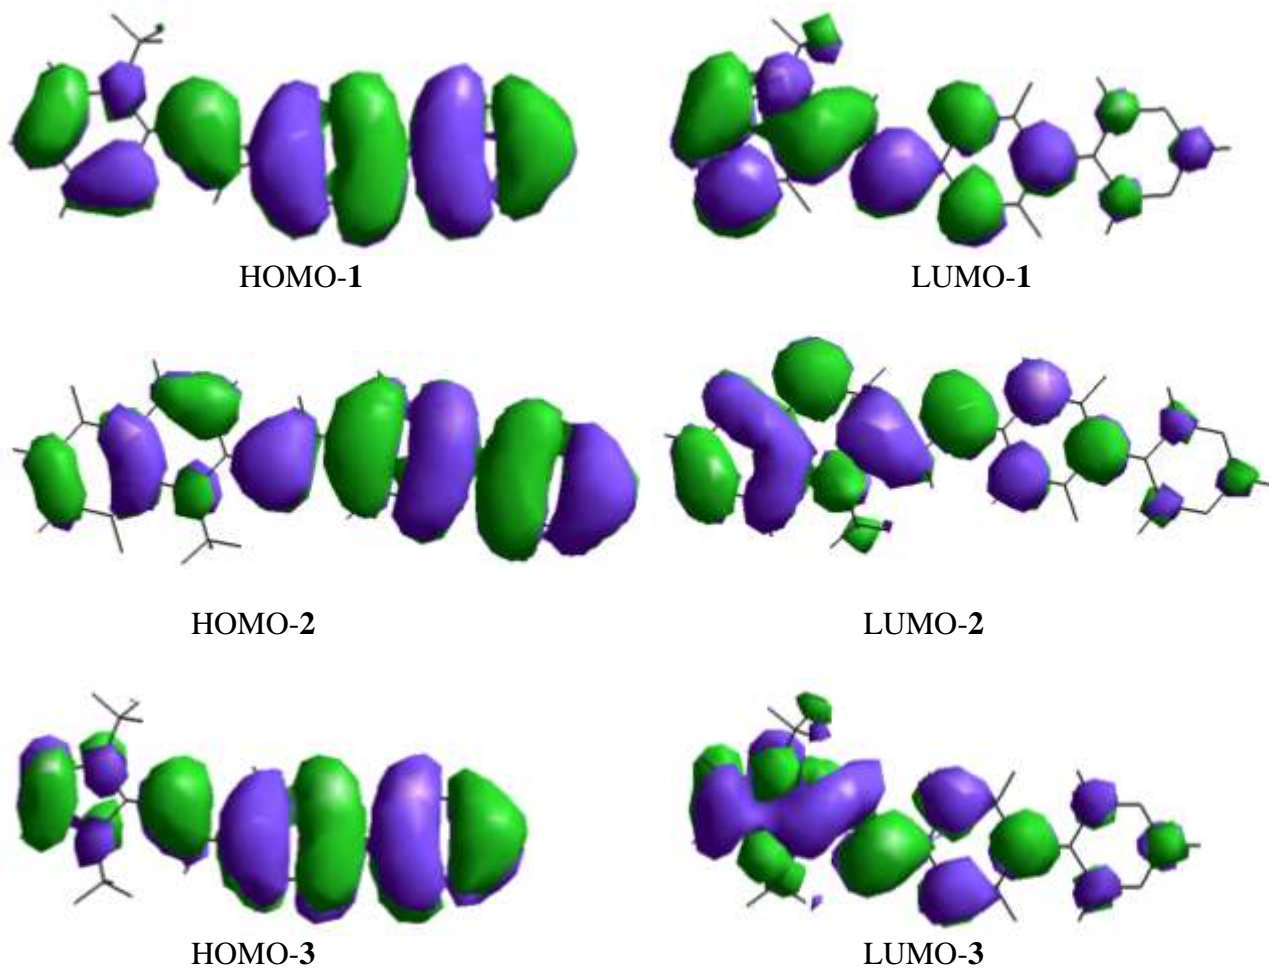

**Fig. ESI 1** Molecular orbitals of **1** as derived by ZINDO/S method. The HOMO-LUMO configuration contributes to the main electronic transition with the highest coefficient.

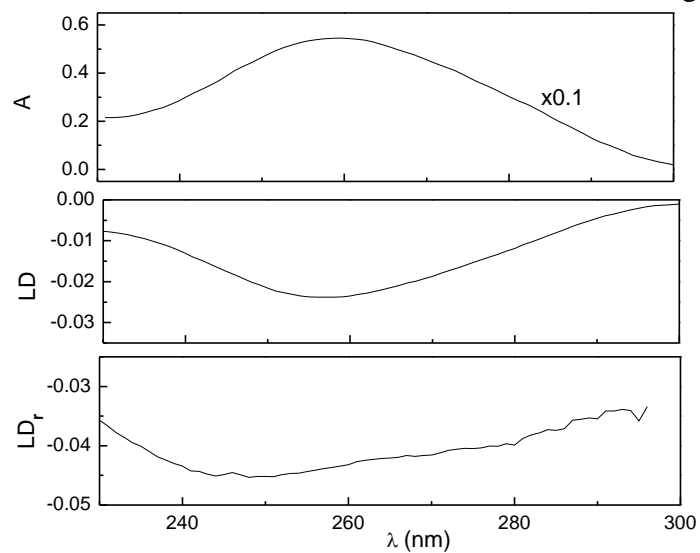

**Fig. ESI 2** Absorption, linear dichroism (LD) and reduced LD<sub>r</sub> spectra for salmon DNA.

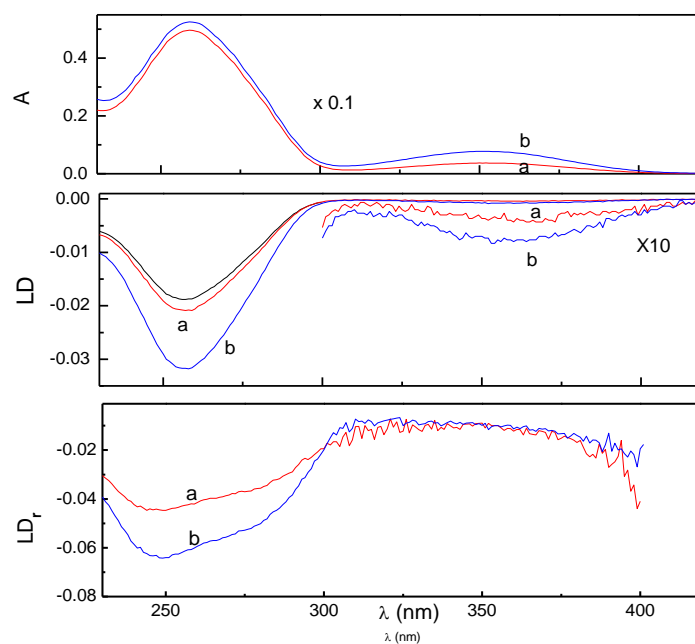

**Fig. ESI 3** Absorption, linear dichroism (LD) and reduced LD<sub>r</sub> spectra for the complex **1**-DNA at a [ligand]/[DNA] ratio of 0.04 (a) and 0.08 (b). LD for DNA is shown for comparison, black trace.

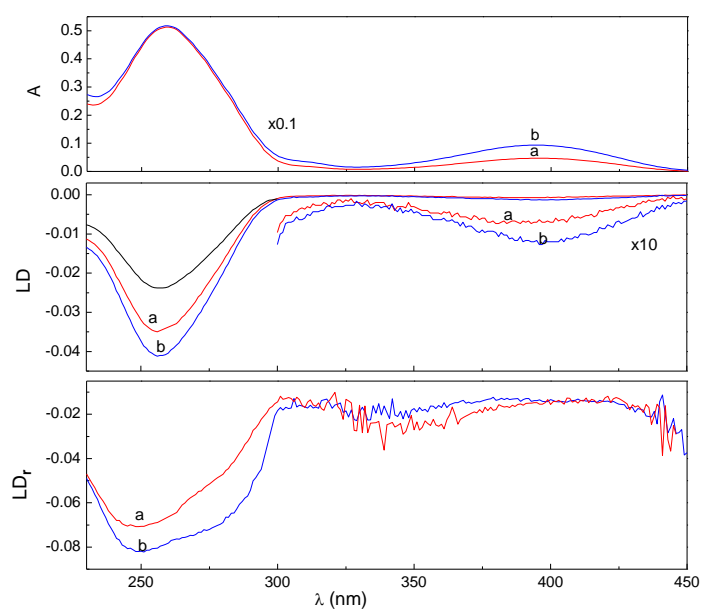

**Fig. ESI 4** Absorption, linear dichroism (LD) and reduced LD<sub>r</sub> spectra for the complex **2**-DNA at a [ligand]/[DNA] ratio of 0.04 (a) and 0.08 (b). LD for DNA is shown for comparison, black trace.

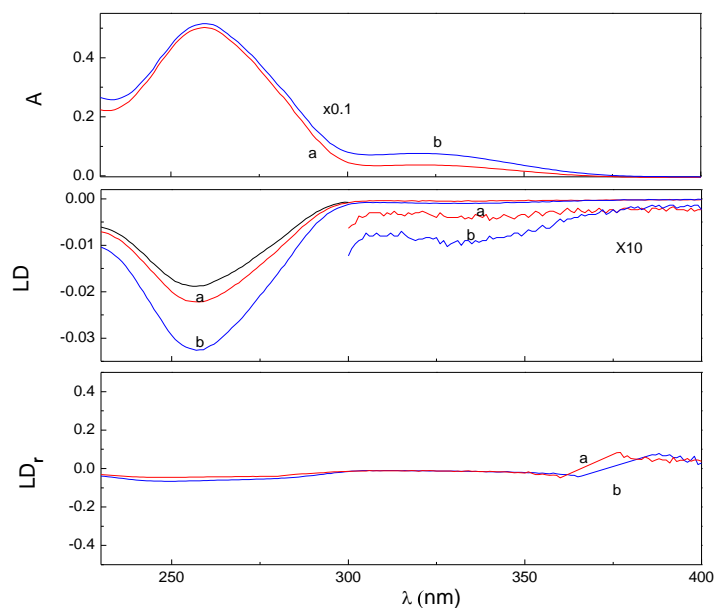

**Fig. ESI 5** Absorption, linear dichroism (LD) and reduced LD<sub>r</sub> spectra for the complex **3**-DNA at a [ligand]/[DNA] ratio of 0.04 (a) and 0.08 (b). LD for DNA is shown for comparison, black trace.

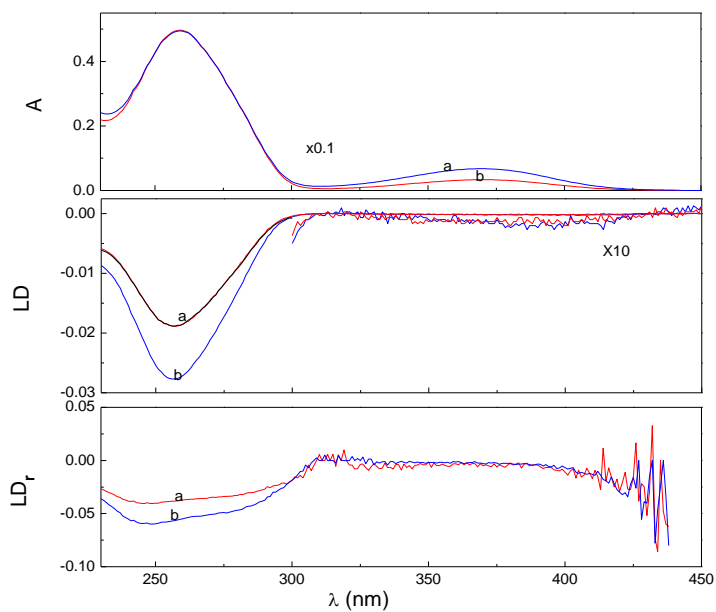

**Fig. ESI 6** Absorption, linear dichroism (LD) and reduced LD<sub>r</sub> spectra for the complex **4**-DNA at a [ligand]/[DNA] ratio of 0.04 (a) and 0.08 (b). LD for DNA is shown for comparison, black trace.

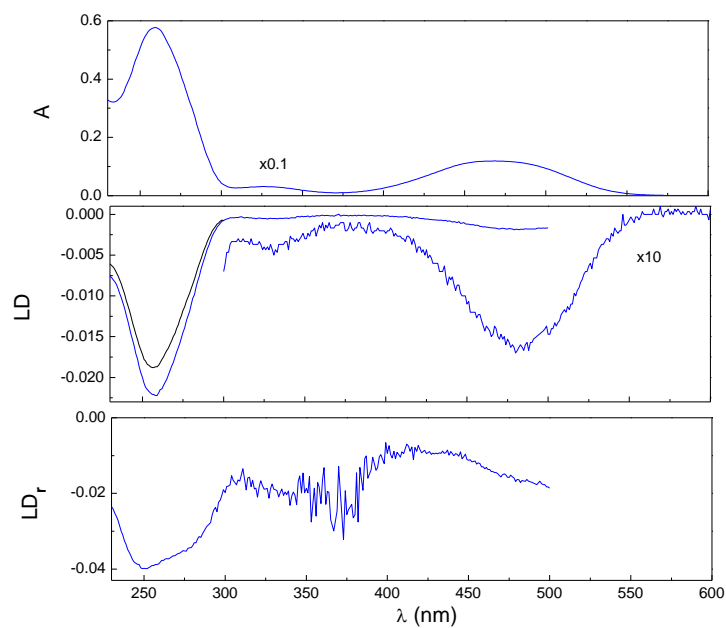

**Fig. ESI 7** Absorption, linear dichroism (LD) and reduced LD<sub>r</sub> spectra for the complex **5**-DNA at a [ligand]/[DNA] ratio of 0.08. LD for DNA is shown for comparison, black trace.

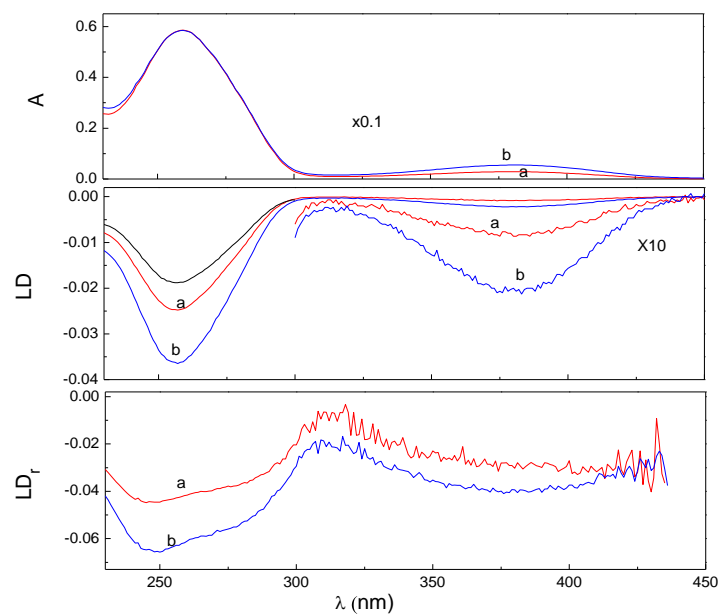

**Fig. ESI 8** Absorption, linear dichroism (LD) and reduced LD<sub>r</sub> spectra for the complex **6**-DNA at a [ligand]/[DNA] ratio of 0.04 (a) and 0.08 (b). LD for DNA is shown for comparison, black trace.

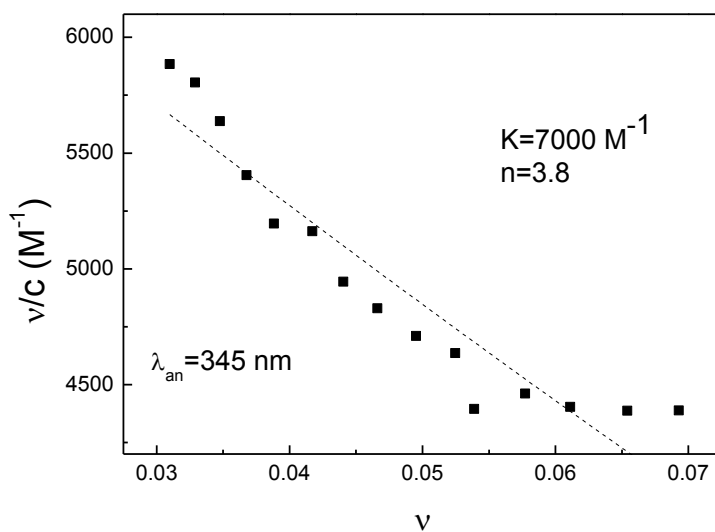

**Fig. ESI 9** Plot to obtain the association constant of the **1**-DNA complex according to the eq. 1.

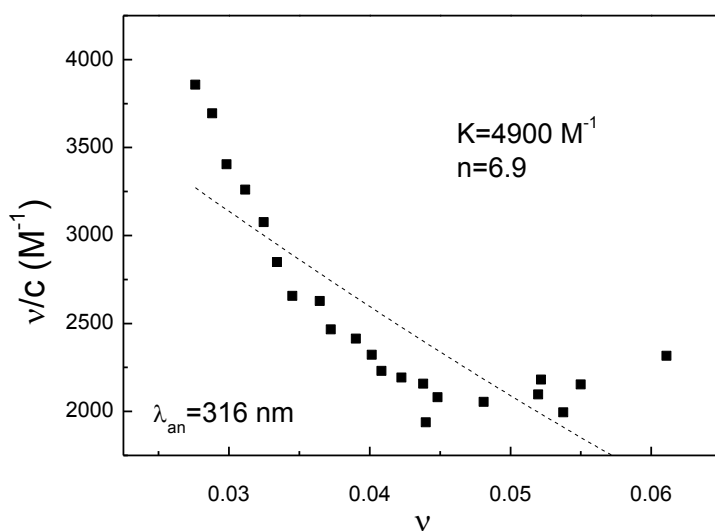

**Fig. ESI 9** Plot to obtain the association constant of the **3**-DNA complex according to the eq. 1.
